# Supplementary material
Source: Springer Nature journal article supplement (https://www.springermedizin.de/resource/supplementary/12916_2010_356_MOESM4_ESM.pdf/9599924)
Supplement: MOESM4 [file 9599924]

Identification

Articles identified through search in the Science Citation Index database (Web of Science)(n=7302)

Chronic Obstructive Pulmonary Disease mortality data from the Eurostat database

Screening

**Excluded articles (n=5147):**

- Non European Union countries (n=3997)
- Neither original article nor review (n=601)
- Subject category  $\neq$  medical (microbiology, biophysics, psychology, social issue ...) (n=549)

**Inclusion criteria:**

- Countries from the European Union
- Data from year 2007

Eligibility

2155 Documents assessed for eligibility:  
Exclusion of non relevant articles by examining title and abstract (n=2090)

Data available for 21 countries

Included

65 original articles + COPD mortality data from 21 countries included in the review
